1 **Reference genome and demographic history of the most endangered marine mammal, the**  
2 **vaquita**

3  
4 Phillip A. Morin<sup>1\*</sup>, Frederick I. Archer<sup>1</sup>, Catherine D. Avila<sup>2</sup>, Jennifer R. Balacco<sup>3</sup>, Yury V.  
5 Bukhman<sup>4</sup>, William Chow<sup>5</sup>, Olivier Fedrigo<sup>3</sup>, Giulio Formenti<sup>3</sup>, Julie A. Fronczek<sup>2</sup>, Arkarachai  
6 Fungtamasan<sup>6</sup>, Frances M.D. Gulland<sup>7</sup>, Bettina Haase<sup>3</sup>, Mads Peter Heide-Jorgensen<sup>8</sup>, Marlys  
7 L. Houck<sup>2</sup>, Kerstin Howe<sup>5</sup>, Ann C. Misuraca<sup>2</sup>, Jacquelyn Mountcastle<sup>3</sup>, Whitney Musser<sup>9</sup>, Sadye  
8 Paez<sup>10</sup>, Sarah Pelan<sup>5</sup>, Adam Phillippy<sup>11</sup>, Arang Rhie<sup>11</sup>, Jacqueline Robinson<sup>12</sup>, Lorenzo Rojas-  
9 Bracho<sup>13</sup>, Teri K. Rowles<sup>14</sup>, Oliver A. Ryder<sup>2</sup>, Cynthia R. Smith<sup>9</sup>, Sacha Stevenson<sup>9</sup>, Barbara L.  
10 Taylor<sup>1</sup>, Jonas Teilmann<sup>15</sup>, James Torrance<sup>5</sup>, Randall S. Wells<sup>16</sup>, Andrew Westgate<sup>17</sup>, Erich D.  
11 Jarvis<sup>10,18</sup>

12  
13 Addresses:

14 <sup>1</sup> Southwest Fisheries Science Center, National Marine Fisheries Service, NOAA, 8901 La Jolla  
15 Shores Dr., La Jolla, CA 92120, USA

16  
17 <sup>2</sup> San Diego Zoo Institute for Conservation Research, Escondido, CA, USA

18  
19 <sup>3</sup> Vertebrate Genome Lab, The Rockefeller University, New York, NY, USA

20  
21 <sup>4</sup> Regenerative Biology, Morgridge Institute for Research, Madison, WI, USA

22  
23 <sup>5</sup> Wellcome Sanger Institute, Hinxton, Cambridge CB10 1SA, UK

24  
25 <sup>6</sup> DNAnexus, Mountain View, CA, USA

26  
27 <sup>7</sup> University of California, Davis, Davis, CA, USA

28  
29 <sup>8</sup> Greenland Institute of Natural Resources, Strandgade 912, 1401, Copenhagen K, Denmark

30  
31 <sup>9</sup> National Marine Mammal Foundation, San Diego, CA, USA

32  
33 <sup>10</sup> Laboratory of Neurogenetics of Language, The Rockefeller University, New York

34  
35 <sup>11</sup> Genome Informatics Section, Computational and Statistical Genomics Branch, National  
36 Human Genome Research Institute, Bethesda, MD, USA.

37  
38 <sup>12</sup> Institute for Human Genetics, University of California, San Francisco, CA, USA

39  
40 <sup>13</sup> Comisión Nacional de Áreas Naturales Protegidas/SEMARNAT, Ensenada, BC, Mexico

41  
42 <sup>14</sup> National Marine Fisheries Service, Office of Protected Resources, Silver Spring, MD, USA  
43

44 <sup>15</sup> Marine Mammal Research, Department of Bioscience, Aarhus University, Frederiksborgvej  
45 399, 4000 Roskilde, Denmark

46  
47 <sup>16</sup> Chicago Zoological Society's Sarasota Dolphin Research Program, c/o Mote Marine  
48 Laboratory, Sarasota, FL 34236, USA

49  
50 <sup>17</sup> University of North Carolina Wilmington, Wilmington, NC 28403, USA

51  
52 <sup>18</sup> Howard Hughes Medical Institute, Chevy Chase, Maryland

53  
54 \*Corresponding author: [phillip.morin@noaa.gov](mailto:phillip.morin@noaa.gov)

55  
56 **Current length:**

57 **Main text = 4515 words**

58 **Abstract = 201 words**

59

60

61

62 **DISCLAIMER: This work has not yet been peer reviewed. The scientific results and**  
63 **conclusions, as well as any views or opinions expressed herein, are those of the author(s) and do**  
64 **not necessarily reflect the views of NOAA or the Department of Commerce.**

65

66

67

68

69 **Abstract**

70

71 The vaquita is the most critically endangered marine mammal, with fewer than 19 remaining in  
72 the wild. First described in 1958, the vaquita has been in rapid decline resulting from inadvertent  
73 deaths due to the increasing use of large-mesh gillnets for more than 20 years. To understand the  
74 evolutionary and demographic history of the vaquita, we used combined long-read sequencing  
75 and long-range scaffolding methods with long- and short-read RNA sequencing to generate a  
76 near error-free annotated reference genome assembly from cell lines derived from a female  
77 individual. The genome assembly consists of 99.92% of the assembled sequence contained in 21  
78 nearly gapless chromosome-length autosome scaffolds and the X-chromosome scaffold, with a  
79 scaffold N50 of 115 Mb. Genome-wide heterozygosity is the lowest (0.01%) of any mammalian  
80 species analyzed to date, but heterozygosity is evenly distributed across the chromosomes,  
81 consistent with long-term small population size at genetic equilibrium, rather than low diversity  
82 resulting from a recent population bottleneck or inbreeding. Historical demography of the  
83 vaquita indicates long-term population stability at less than 5000 ( $N_e$ ) for over 200,000 years.  
84 Together, these analyses indicate that the vaquita genome has had ample opportunity to purge  
85 highly deleterious alleles and potentially maintain diversity necessary for population health.

86

87

88

89

## 90 **Introduction**

91

92 In the afternoon of November 4, 2017, an adult female vaquita porpoise (*Phocoena sinus*), the  
93 smallest and rarest cetacean in the world, was captured in a massive effort to save the species by  
94 bringing into captivity as many as possible of the estimated maximum of 30 remaining  
95 individuals at the time (Thomas et al., 2017). This represented only the second live capture of a  
96 vaquita ever, the first of which, just a few weeks earlier, resulted in release of the animal after  
97 only hours when it showed signs of continuing stress. Despite the efforts of an international team  
98 of scientists and experts in porpoise capture and care, the second captured vaquita (V02F),  
99 suffered stress-induced cardiac failure and died approximately seven hours after initial capture  
100 (Rojas-Bracho et al., 2019). That death ended the effort by the Vaquita Conservation, Protection,  
101 and Recovery (VaquitaCPR) project to temporarily protect vaquita near their native habitat in the  
102 northern Gulf of California, near San Felipe, Mexico. However, the careful planning and  
103 presence of veterinarian experts in marine mammal stranding response allowed for an immediate  
104 necropsy that went through the night, with harvest and storage of ovaries and other tissues for  
105 delivery to facilities 260 miles north near San Diego, California for tissue culture and  
106 cryopreservation. By eight p.m. the next day, within 24 hours of the animal's cardiac arrest, the  
107 tissues were delivered to the Institute for Conservation Research, San Diego Zoo Global, for the  
108 culture of cells from as many tissues as possible. After weeks of tissue culture, cells were  
109 harvested and banked for future research, and frozen samples sent to the Vertebrate Genome Lab  
110 at The Rockefeller University to extract ultra-high molecular weight DNA and RNA for genome  
111 sequencing, assembly and transcriptome annotation.

112

113 This extraordinary effort to extract as much information as possible from the VaquitaCPR  
114 project reflects the broad scientific value placed on biodiversity and conservation. Sequencing of  
115 reference genomes is increasingly recognized as an important contribution to identify,  
116 characterize and conserve biodiversity (Garner et al., 2016; Harrisson, Pavlova, Telonis-Scott, &  
117 Sunnucks, 2014; He, Johansson, & Heath, 2016; Kraus et al., submitted; Morin et al., in revision;  
118 Supple & Shapiro, 2018), especially for species that are naturally rare and difficult to study.  
119 Reference genomes provide primary data to understand evolutionary relationships (Arnason,  
120 Lammers, Kumar, Nilsson, & Janke, 2018; Zhou et al., 2018), historical demography (Armstrong

121 et al., 2019; Andrew D Foote et al., 2016; Morin et al., 2018a; Robinson et al., 2016; Westbury,  
122 Petersen, Garde, Heide-Jorgensen, & Lorenzen, 2019), evolution of genes and traits (Autenrieth  
123 et al., 2018; Fan et al., 2019; A. D. Foote et al., 2015; Morin et al., in revision; Springer et al.,  
124 2016a; Springer, Starrett, Morin, Hayashi, & Gatesy, 2016b; Yim et al., 2014) and susceptibility  
125 to inbreeding and outbreeding depression (Chattopadhyay et al., 2019; Hedrick, Robinson,  
126 Peterson, & Vucetich, 2019; Robinson, Brown, Kim, Lohmueller, & Wayne, 2018; Tunstall et  
127 al., 2018). Genomic resources also provide the tools for broader studies of population structure,  
128 relatedness and potential for recovery (e.g., Garner et al., 2016; Morin et al., 2018b; Tunstall et  
129 al., 2018).

130

131 The vaquita was described for the first time in 1958 (Norris & McFarland, 1958) and has been  
132 characterized as a naturally rare endemic species, limited to shallow, turbid and highly  
133 productive habitat in the upper Gulf of California between Baja California and mainland Mexico  
134 (Rodriguez-Perez, Auriolles-Gamboa, Sanchez-Velasco, Lavin, & Newsome, 2018). The  
135 vaquita's closest relatives are the congeneric Burmeister's (*P. spinipinnis*) and spectacled (*P.*  
136 *dioptrica*) porpoises, which are found only in temperate and cold waters in the Southern  
137 Hemisphere, separated by at least 5000 km of ocean and two million years of divergence (Ben  
138 Chehida et al., in revision; McGowen, Spaulding, & Gatesy, 2009; Rosel, Haygood, & Perrin,  
139 1995). Similar to other porpoises, vaquitas become entangled and die in gillnets set for finfish  
140 and shrimp (Rojas-Bracho & Reeves, 2013). The mortality rate was known to be unsustainable  
141 when studies on the bycatch rate (D'Agrosa, Lennert-Cody, & Vidal, 2000) and life history  
142 (Hohn, Read, Fernandez, Vidal, & Findley, 1996) were combined with the first abundance  
143 estimate of N=567 individuals (95% C.I. = 177-1073) in 1997 (Armando M. Jaramillo-  
144 Legorreta, Rojas-Bracho, & Gerrodette, 1999). The rate of decline has increased since  
145 approximately 2011 due to entanglement in illegal gillnets targeting totoaba (*Totoaba*  
146 *macdonaldi*), a large fish approximately the same size as the vaquita, captured for the black  
147 market trade of their swim bladders in China (Rojas-Bracho et al., 2019). The most recent  
148 estimates from 2018 indicate that fewer than 19 vaquita survive (A. M. Jaramillo-Legorreta et  
149 al., 2019). Initial genetics studies found no variation in mitochondrial DNA (mtDNA; Rosel &  
150 Rojas-Bracho, 1999) and low variation in the MHC DRB locus (Munguia-Vega et al., 2007).  
151 These authors have suggested that the low genetic diversity is due to long-term low effective

152 population size ( $N_e$ ) rather than to a recent bottleneck or the current rapid population decline  
153 (Munguia-Vega et al., 2007; Rojas-Bracho & Taylor, 1999; B. L. Taylor & Rojas-Bracho, 1999),  
154 but these data from few loci provide limited power to estimate timing or duration of  
155 demographic changes.

156  
157 As part of the effort to prevent extinction of the vaquita and to further develop genomic  
158 resources to facilitate conservation and management planning for this and other endangered  
159 species, we used the Vertebrate Genomes Project (VGP) pipeline to generate a chromosomal-  
160 level, haplotype-phased reference vaquita genome assembly that exceeds the “platinum-quality”  
161 reference standards established by the VGP (Rhie et al., 2020a). The VGP standards are  
162 guidelines to ensure minimum error rates (QV40 or higher, or no more than 1 nucleotide error  
163 per 10,000 bp), highly contiguous and complete assemblies (contig N50  $\geq$  1 Mb; chromosomal  
164 scaffold N50  $\geq$  10 Mb), phasing of paternal and maternal haplotypes to reduce false gene  
165 duplication errors and manual curation to reduce errors and improve genome assembly quality.  
166 Based on the reference-quality assembly, we analyzed genomic diversity and historical  
167 demography to infer the cause of current low genomic diversity and whether genetic factors  
168 should be considered to be of concern for recovery if the immediate reason for decline, incidental  
169 bycatch in gillnets, can be halted in time to prevent extinction.

170

## 171 **Materials and Methods**

172

### 173 *Genome data generation*

174 Skin, mesovarium, kidney, trachea, and liver tissues were obtained during necropsy of the adult  
175 female vaquita that died during an attempt to begin ex-situ protection from illegal fishing  
176 operations (Rojas-Bracho et al., 2019). Cells were harvested and cultured at the Institute for  
177 Conservation Research, San Diego Zoo Global (Frozen Zoo®). From these cells, we generated a  
178 reference quality genome using the VGP pipeline 1.5 (Rhie et al., 2020a). In particular, we  
179 collected four genomic data types: Pacific Biosciences (Menlo Park, CA, USA) continuous long  
180 reads (CLR), 10X Genomics (Pleasanton, CA, USA) linked-reads, Bionano Genomics, Inc. (San  
181 Diego, CA, USA) DLS optical maps, and Arima Genomics, Inc. (San Diego, CA, USA) v1 Hi-C  
182 data. From one tube containing ~4 million cells in XPBS buffer with 10% DMSO and 10%

183 Glycerol, ultra-high molecular weight DNA (uHMW DNA) was extracted using the agarose plug  
184 Bionano Genomics protocol for Cell Culture DNA Isolation (Bionano Genomics, document No.  
185 30026F). uHMW DNA quality was assessed by a Pulsed Field Gel assay and quantified with a  
186 Qubit 2 Fluorometer. From these extractions, 10  $\mu$ g of uHMW DNA was sheared using a 26G  
187 blunt end needle (PacBio protocol PN 101-181-000 Version 05). A large-insert PacBio library  
188 was prepared using the Pacific Biosciences Express Template Prep Kit v1.0 (PN 101-357-000)  
189 following the manufacturer protocol. The library was then size selected (>20 kb) using the Sage  
190 Science BluePippin Size-Selection System and sequenced on 30 PacBio 1M v3 SMRT cells on  
191 the Sequel I instrument with the sequencing kit 3.0 (PN 101-597-800) and 10 hours movie. We  
192 used the same unfragmented DNA to generate a linked-reads library on the 10X Genomics  
193 Chromium linked-reads library (Genome Library Kit & Gel Bead Kit v2, PN 120258, Genome  
194 HT Library Kit & Gel Bead Kit v2, PN 120261, Genome Chip Kit v2, PN 120257, i7 Multiplex  
195 Kit, PN 120262). We sequenced this 10X Genomics library on an Illumina Novaseq S4 150 bp  
196 PE lane.

197  
198 An aliquot of the same DNA was labeled for Bionano Genomics optical mapping using the  
199 Bionano Prep Direct Label and Stain (DLS) Protocol (document No. 30206E) and run on one  
200 Saphyr instrument chip flowcell. Hi-C reactions were performed by Arima Genomics according  
201 to the protocols described in the Arima-HiC kit (PN A510008). After the Arima-HiC protocol,  
202 Illumina-compatible sequencing libraries were prepared by first shearing purified Arima-HiC  
203 proximally-ligated DNA and then size-selecting DNA fragments from ~200-600 bp using SPRI  
204 beads. The size-selected fragments were then enriched for biotin and converted into Illumina-  
205 compatible sequencing libraries using the KAPA Hyper Prep kit (PN KK8504). After adapter  
206 ligation, DNA was PCR amplified and purified using SPRI beads. The purified DNA underwent  
207 standard QC (qPCR and Bioanalyzer (Agilent)) and was sequenced on the Illumina HiSeq X to  
208 ~60X coverage following the manufacturer's protocols.

209

### 210 *Transcriptome data generation*

211 Total RNA extraction and purification was conducted with QIAGEN RNAeasy kit (PN 74104).  
212 The quality and quantity of all RNAs were measured using a Fragment Analyzer (Aligent  
213 Technologies, Santa Clara, CA) and a Qubit 2.0 (Invitrogen). PacBio Iso-seq libraries were



214 prepared according to the ‘Procedure & Checklist - Iso-Seq™ Template Preparation for Sequel®  
215 Systems’ (PN 101-763-800 Version 01). Briefly, cDNA was reverse transcribed using the  
216 NEBNext® Single Cell/Low Input cDNA Synthesis & Amplification Module (NEB E6421S)  
217 from 238 ng total RNA. Amplified cDNA was cleaned with 86 µl ProNex beads. The PacBio  
218 Iso-seq library was sequenced on one PacBio 8M (PN 101-389-001) SMRT Cell on the Sequel II  
219 instrument with sequencing kit 1.0 (PN 101-746-800) using the Sequel II Binding Kit 1.0 (PN  
220 101-726-700) and 30 hours movie with two hours pre-extension.

221  
222 The same RNA was used for mRNA-seq. The RNA-Seq library was prepared with 100 ng total  
223 RNA using the NEBNext Poly(A) mRNA Magnetic Isolation Module (NEB, PN E7490S)  
224 followed by NEBNext Ultra II Directional RNA Library Prep Kit for Illumina (PN E7760S). The  
225 library was then amplified over 14 cycles. Library quantification and qualification were  
226 performed with the Invitrogen Qubit dsDNA HS Assay Kit (PN Q32854). Libraries were  
227 sequenced on the Illumina NextSeq 500 in 150PE mid-output mode (Rockefeller Genomics  
228 Center). Data quality control was done using fastQC (v0.11.5;  
229 <https://qubeshub.org/resources/fastqc>).

230

### 231 *Genome assembly and annotation*

232 We assembled the vaquita genome using the VGP 1.5 pipeline on the DNAnexus cloud  
233 computing system (<https://platform.dnanexus.com/>). Briefly, this pipeline is composed of an  
234 assembly step, scaffolding step and final polishing step. First, we assembled raw PacBio data  
235 with Falcon 2.0.0/Falcon-unzip 1.1.0 (Chin et al., 2016). Then, we polished the primary and  
236 alternate contigs using the same PacBio reads with arrow (PacBio smrtanalysis 6.0.0.47841).  
237 Prior to scaffolding, we detected and reassigned haplotype duplicated contigs in the primary  
238 contig set using purge\_haplotig 1.0.4 (Roach, Schmidt, & Borneman, 2018) and we also  
239 extracted the mitochondrial reads to assemble the mitochondrial sequence (Formenti et al., in  
240 prep). From this step, we only scaffolded the primary contigs using 10X Genomics data with  
241 scaff10x 4.1 (<https://github.com/wtsi-hpag/Scaff10X>), Bionano CMAP with Bionano Hybrid  
242 Solve 3.3\_10252018 (Bionano Genomics) and Hi-C data with Salsa 2.2 (Ghurye, Pop, Koren,  
243 Bickhart, & Chin, 2017). Finally, the resulting primary scaffolds and alternate contigs were  
244 processed together through three polishing rounds: one additional round of arrow polishing and



245 two rounds of polishing using 10X Illumina data mapped with Long Ranger 2.2.2  
246 (<https://github.com/10XGenomics/longranger>) and base calling with FreeBayes 1.2.0 (Garrison  
247 & Marth, 2012). Primary scaffolds and alternate contigs were contamination checked and curated  
248 manually using gEVAL (Chow et al., 2016). For the primary assembly, this resulted in a further  
249 reduction of scaffold numbers by 11% and an increase of the scaffold N50 by 12% to 115 Mb.  
250 The primary and associated alternate assemblies were submitted to NCBI (accession  
251 GCA\_008692025.1), and annotation was performed through their standard pipeline  
252 incorporating our RNA-seq and Iso-seq data  
253 ([https://www.ncbi.nlm.nih.gov/genome/annotation\\_euk/process/](https://www.ncbi.nlm.nih.gov/genome/annotation_euk/process/)). The primary assembly was  
254 screened for repetitive elements using RepeatMasker v4.0.5 (Smit, Hubley, & Green, 2013-2015)  
255 and the RepeatMasker combined database Dfam\_Consensus-20181026. Base accuracy (QV) was  
256 measured using k=21 with Merqury (Rhie, Walenz, Koren, & Phillippy, 2020b). Gene content of  
257 the primary scaffolds was assessed using BUSCO v3.1.0 (Waterhouse et al., 2017) searches of  
258 the Laurasiatheria and mammalian gene set databases.

259

### 260 *Historical demography*

261 To conduct analysis of historical demography using pairwise sequentially Markovian coalescent  
262 (PSMC; Li & Durbin, 2011), we first generated a diploid consensus genome from the 10X  
263 Genomics paired-end reads aligned to the primary haplotype assembly (Armstrong et al., 2019).  
264 The reads were trimmed with the BBduk function of BBTools ([sourceforge.net/projects/bbmap/](https://sourceforge.net/projects/bbmap/)),  
265 removing the first 22 nucleotides of the R1 reads introduced during the Chromium library  
266 preparation ([https://support.10xgenomics.com/genome-exome/library-prep/doc/technical-note-  
267 assay-scheme-and-configuration-of-chromium-genome-v2-libraries](https://support.10xgenomics.com/genome-exome/library-prep/doc/technical-note-assay-scheme-and-configuration-of-chromium-genome-v2-libraries)) and trimming all reads for  
268 average quality ( $q \geq 20$ ), 3' ends trimmed to  $q \geq 15$  and minimum length ( $\geq 40$  nucleotides).  
269 Unpaired reads were removed from the trimmed fastq files using the BBTools repair.sh function.  
270 Trimmed reads were aligned to the vaquita mitogenome (accession CM018178.1) using BWA  
271 mem (Li & Durbin, 2009), and the unmapped reads exported as reads representing only the  
272 nuclear genome. Nuclear reads were aligned to the primary haplotype assembly (accession  
273 GCA\_008692025.1), and duplicate reads removed using Picard-Tools  
274 (<http://broadinstitute.github.io/picard/>). The resulting genome alignments from four 10X  
275 Genomics libraries were assessed for average depth of coverage using ANGSD (Korneliussen,

276 Albrechtsen, & Nielsen, 2014), and combined for 47.8X average depth of coverage. From this  
277 coverage pile-up, the diploid consensus genome was extracted (Li & Durbin, 2011) and used as  
278 input for PSMC with generation time of 11.9 years based on the estimated generation time of  
279 harbor porpoise (Barbara L Taylor, Chivers, Larese, & Perrin, 2007), and an autosomal mutation  
280 rate ( $\mu A$ ) of  $1.08 \times 10^{-8}$  substitutions per nucleotide per generation (Dornburg, Brandley,  
281 McGowen, & Near, 2012). PSMC atomic time intervals were combined as suggested by the  
282 authors (<https://github.com/lh3/psmc>) such that after 20 rounds of iterations, at least ~10  
283 recombinations are inferred to occur in the intervals each parameter spans:  $p = (8+23*2+9+1)$ .  
284 The remaining parameters were left as the default values used for humans (Li & Durbin, 2011),  
285 and we performed 100 bootstrap resamplings on all PSMC analyses to assess variance of the  
286 model.

287

### 288 *Genome-wide heterozygosity*

289 The distribution of heterozygosity across the genome was determined using previously described  
290 analysis pipelines (Robinson et al., 2019). Briefly, we used HaplotypeCaller in the Genome  
291 Analysis Toolkit (GATK; McKenna et al., 2010) to call genotypes from the short-read pile-up  
292 (above), filtering out sites with  $<1/3X$  or  $>2X$  the average depth of coverage. Heterozygosity was  
293 calculated as the number of heterozygous sites divided by the total number of called genotypes in  
294 nonoverlapping 1Mb windows across each scaffold.

295

### 296 *Modeling demographic effects on heterozygosity*

297 A coalescent simulation was constructed to estimate recent effective population size ( $rN_e$ ),  
298 historical effective population size ( $hN_e$ ) and time since a bottleneck ( $b$ ) in which the population  
299 reduced in size from  $hN_e$  to  $rN_e$ . The analysis computed the likelihood of the empirical  
300 distribution of the number of heterozygous sites per kb ( $H_{kb}$ ) observed in 2244 1 Mb windows in  
301 the vaquita genome (from above) given similar distributions drawn from an equivalent genome  
302 arising from random draws of each of these parameters, which were sampled as:

303

$$304 \quad rN_e \sim \text{Uniform}(0, 3) \times 10^4$$

$$305 \quad hN_e \sim \text{Uniform}(0, 9) \times 10^4$$

$$306 \quad b \sim 10^{\text{Uniform}(0, 7)}$$

307  
308 We initially drew 50,000 random values from these distributions. We then randomly selected  
309 20,000 of these values where average growth rates ( $(rN_e / hN_e) / b$ ) were less than 1.06, as values  
310 above this were considered to be biologically improbable (B. L. Taylor et al., 2019).

311  
312 For each of the 20,000 scenarios, we generated one million independent SNPs for a single  
313 individual with a mutation rate of  $1.08 \times 10^{-8}$  substitutions/site/generation and a generation time  
314 of 11.9 years. To capture variability in the coalescent, we ran 4488 replicates of each scenario,  
315 which was twice the number of ~1 Mb windows in the empirical vaquita genome. This ensured  
316 that we could produce enough random sets of 2244 1 Mb windows from which to compute the  
317 scenario likelihoods as described below. The simulations were run with *fastsimcoal* v2.6.2  
318 (Excoffier, Dupanloup, Huerta-Sanchez, Sousa, & Foll, 2013) through the R package *strataG*  
319 (v4.9.05).

320  
321 For each of the 4488 replicates of one million SNPs in a scenario, we calculated the number of  
322 heterozygous SNPs per KB ( $H'_{kb}$ ). We then drew a random 2244 values of  $H'_{kb}$  without  
323 replacement to represent one simulated genome for this scenario. We fit a gamma distribution to  
324 these values, which was used to compute the negative sum of log-likelihoods (-logL) of the  
325 empirical  $H_{kb}$  from the vaquita genome. For each scenario, we repeated this random draw of  
326 2244 values of  $H'_{kb}$  and computation of -logL 100 times and recorded the mean and standard  
327 deviation of -logL. Likelihoods were plotted as heatmaps of the LOESS smoothed fit of -logL  
328 across pairs of simulation parameters. LOESS models were fit to each pair of parameters  
329 separately, and the surfaces represent the predicted -logL of 100,000 (10,000 x 10,000) evenly  
330 spaced points across each plot.

331

332

## 333 **Results**

### 334 *A highly contiguous assembly of the vaquita genome*

335 We assembled a 2.37 Gb genome (Table 1) in only 64 scaffolds, of which 21 represented arm-to-  
336 arm autosomes, named according to synteny with the blue whale (*Balaenoptera musculus*) and  
337 the X chromosome, in agreement with the 22-chromosome karyotype. The remaining 42

338 unplaced scaffolds consisted of only 0.198 Gb combined (0.08% of the total length), meaning  
339 that 99.92% of the assembled sequence has been assigned to chromosomes. Consistent with this  
340 mostly complete assembly, the N50 contig value was 20.22 Mb (273 contigs), N50 scaffold was  
341 115.47 Mb, and base call accuracy was QV40.88 (0.82 errors per 10,000 bp). There were only  
342 208 gaps, of which the annotated chromosomes had 3-17 gaps each. The Hi-C heat-map showing  
343 genomic interactions (Figure 1) indicates strong agreement between the close interactions and  
344 chromosome-length scaffolds. The alternate haplotype contigs are made up of 1 Gb of the  
345 genome, indicating low heterozygosity. Depth of coverage for each data type are presented in  
346 Table 2. Assemblies of both primary and alternate haplotypes have been deposited at  
347 DDBJ/ENA/GenBank under the accessions VOSU000000000 (principle haplotype) and  
348 VOSV000000000 (alternate haplotype) in BioProjects PRJNA557831 and PRJNA557832,  
349 respectively.

350  
351 BUSCO analysis showed 89.9% and 91.6% gene content identification from the primary  
352 haplotype when compared to the Laurasiatheria and mammalian data sets, respectively, with only  
353 1.0 and 1.1% of the complete genes duplicated, respectively, and 4.3 and 4.6% fragmented  
354 (Supplemental Table S1). Genome annotation identified 26,497 genes and pseudogenes, 19,069  
355 of which are protein coding (Table S2). The cumulative number of genes with alignment to the  
356 UniProtKB/Swiss-Prot curated proteins was 18,748 (89%) at  $\geq 90\%$  coverage of the target  
357 protein. This coverage was 5-48% higher than the number of genes aligned from other annotated  
358 cetacean genomes (Table S2). Similar to other cetacean genomes (e.g., Fan et al., 2019; Keane et  
359 al., 2015; Tollis et al., 2019), the vaquita genome consisted of about 46% repeats (Table 3) based  
360 on RepeatMasker.

361  
362 *Low heterozygosity of the vaquita genome*

363 Genome-wide heterozygosity was 0.0105% overall, with even distribution of heterozygosity  
364 across the genome (Figure 2A). Heterozygosity per 1 Mb window ranged from 0 to 1.2/kb, but  
365 only two (noncontiguous) windows out of 2247 had no heterozygotes, and the standard deviation  
366 of heterozygosity across the windows was very low (SD = 0.0000767). None of the 1 Mb  
367 windows had heterozygosity of  $> 1.3/\text{kb}$ , and 94% of the windows had heterozygosity of  $< 0.2/\text{kb}$   
368 (Figure 2B). In comparison to other mammals, the vaquita genome exhibits the lowest

369 heterozygosity yet detected in an outbreeding mammalian species (Figure 3), with the exception  
370 of the San Nicolas Island fox (*Urocyon littoralis*), an endemic subspecies found only on a 58  
371 km<sup>2</sup> island approximately 100 km off the coast of California, with an estimated population size  
372 of about 500 individuals (Robinson et al., 2016). However, unlike the vaquita, heterozygosity is  
373 not evenly distributed across the genome in the San Nicolas Island fox and other small inbred  
374 populations of canids, due to the effects of recent inbreeding in addition to long-term small  
375 population sizes (Robinson et al., 2019).

376

#### 377 *Vaquita population size over time*

378 This low, relatively even heterozygosity across the vaquita genome could be indicative of a long-  
379 term small, outbred population (Robinson et al., 2019; Westbury et al., 2019) To test this  
380 hypotheses, we performed PSMC analysis. The results indicates that the vaquita effective  
381 population size has been small, ranging from about 1,400 to 3,200 for most of the last ~300,000  
382 years (Figure 4A). This finding corroborates previous conclusions based on single-locus analyses  
383 (Munguia-Vega et al., 2007; B. L. Taylor & Rojas-Bracho, 1999) but extends the duration of  
384 persistence of the species at low *Ne* to the mid Pleistocene, prior to the penultimate glacial  
385 period, the Saalian, which lasted from approximately 300,000 to 130,000 years ago.

386

#### 387 **Discussion**

388 We have assembled the most complete cetacean genome to date, as measured by the low number  
389 of scaffolds, small number of gaps per chromosome scaffold, high percentage of scaffolds  
390 assigned to 22 chromosomes, cumulative number of genes with an alignment to the  
391 UniProtKB/Swiss-Prot curated proteins and small amount of missing data. Identification of gene  
392 content was also in the expected range for a high-quality mammalian genome at 90.5% of  
393 complete single-copy genes from the BUSCO mammalian gene set, with a low level of false  
394 duplicates and low levels of fragmented genes.

395

396 The PSMC analysis indicates that the vaquita population declined during the late Pleistocene,  
397 most likely due to climate change and the associated habitat changes in the eastern North Pacific  
398 coastal regions of North and Central America, and that it remained small over the last  
399 approximately 300,000 years. PSMC results can be affected by population structure, inbreeding,

400 changes in connectivity among populations and stochastic variation in coalescent events when  
401 diversity is low (Beichman, Phung, & Lohmueller, 2017; Li & Durbin, 2011; Mazet, Rodriguez,  
402 Grusea, Boitard, & Chikhi, 2016; Orozco-terWengel, 2016). The coalescent results are consistent  
403 with the PSMC-inferred historical demography being the most likely cause of current  
404 heterozygosity levels rather than a recent severe bottleneck or inbreeding. Importantly, the  
405 duration of the small population size indicates that the observed level of heterozygosity is the  
406 result of a population at genetic equilibrium, where mutations are balanced by drift and selection,  
407 and that highly deleterious mutations are likely to have been purged from the population (Day,  
408 Bryant, & Meffert, 2003; Dussex et al., in revision; Robinson et al., 2018; Westbury et al., 2018;  
409 Westbury et al., 2019).

410  
411 Examples of species with low diversity but long-term viability and potential for adaptability are  
412 becoming more common (Dussex et al., in revision; Andrew D Foote et al., 2019; Robinson et  
413 al., 2018; Westbury et al., 2018; Westbury et al., 2019; Xue et al., 2015). Among odontocetes  
414 (toothed whales, dolphins and porpoises), in particular, there are examples of species with nearly  
415 as low diversity as the vaquita that exhibit strong evidence of the influence of demographic  
416 factors influencing genome-wide diversity over tens to hundreds of thousands of years of  
417 diversification and adaptation (Andrew D Foote et al., 2019; Andrew D Foote et al., 2016; Van  
418 Cise et al., 2019; Westbury et al., 2019). In several of these cases where it has been examined,  
419 genome-wide heterozygosity patterns do not indicate that low diversity was caused by rapid  
420 bottlenecks or inbreeding; instead, these patterns indicate that low diversity has been present for  
421 extended periods while species persist and diversify (e.g., narwhal (Westbury et al., 2019), orca  
422 (Andrew D Foote et al., 2019)). These examples and others (Robinson et al., 2018; Robinson et  
423 al., 2016; Westbury et al., 2018) indicate that, contrary to the paradigm of an “extinction vortex”  
424 (Gilpin & Soulé, 1986) that may doom species with low diversity, some species have persisted  
425 with low genomic diversity and small population size. Long-term small population size enables  
426 the purging of recessive deleterious alleles, thereby reducing the risk of inbreeding depression,  
427 perhaps allowing for continued future persistence with relatively small population sizes and an  
428 increased tolerance to the genetic consequences of bottlenecks.

429



430 The vaquita's current habitat in the upper Gulf of California was likely diminished or absent due  
431 to low sea levels several times through the last 350,000 years (Siddall et al., 2003), with the  
432 lowest sea level occurring at the end of the Saalian complex and the LGM (Figure 2) followed by  
433 a rapid rise of 120-140 m (similar to the present level) during the Eemian warm period between  
434 115,000 and 130,000 years ago and after the LGM (Figure 5). Over much of the last 100,000  
435 years, sea level has been intermediate between the high points (present and Eemian warm period)  
436 and lows (end of Saalian and the LGM) (Rohling et al., 2017). There is no fossil record or other  
437 indication that vaquita have ever inhabited colder parts of the eastern North Pacific along the  
438 west coast of Baja California, Mexico, or further north off of California at the southern end of  
439 the current range of the congeneric harbor porpoise (*Phocoena phocoena*) (Brownell Jr., 1983).  
440 The closest relative of the vaquita, the Burmeister's porpoise or the ancestor of two sister  
441 species, Burmeister's and spectacled porpoise (Ben Chehida et al., in revision), are both found  
442 only in temperate and cold waters of the southern hemisphere. Based on the closer relationship to  
443 southern hemisphere species and on the similar timing of rapid climate warming and vaquita  
444 population decline, it appears that climate change at the end of the Saalian ice age caused a  
445 northward shift of the species range, resulting in a remnant population being isolated in the Gulf  
446 of California, where it has persisted in the newly expanded and shallow, highly productive upper  
447 Gulf region.

448  
449 The reference genome presented here has provided important insight into the demographic  
450 history of the critically endangered vaquita, reinforcing a previous hypothesis (B. L. Taylor &  
451 Rojas-Bracho, 1999) that the low genetic diversity of the vaquita is not due to a recent extreme  
452 bottleneck or current inbreeding. These results taken together with recent evidence of healthy  
453 looking vaquitas, often with robust calves (B. L. Taylor et al., 2019), suggest that population  
454 recovery may not be hindered because of genetic issues. Analysis of re-sequenced genomes from  
455 multiple individuals sampled over the previous few decades will shed light on changes in  
456 inbreeding as the population has declined due to bycatch in gillnets, and whether deleterious  
457 mutations are likely to have been purged from the genome as a result of the long-term  
458 persistence at a small population size, as has been suggested for some other species and  
459 populations (e.g., Dussex et al., in revision; Robinson et al., 2018; Westbury et al., 2018;  
460 Westbury et al., 2019).



461  
462 Finally, this genome assembly is the highest quality, most complete genome in the odontocete  
463 lineage that consists of all dolphins, porpoises and toothed whales. As such, it provides a  
464 genomic resource for better reference-guided assemblies and scaffolding of other cetacean  
465 genomes (Alonge et al., 2019; Lischer & Shimizu, 2017; Morin et al., in revision) and for  
466 comparative genomics, especially for variation in genome structure. We expect that the vaquita  
467 genome, along with expected assembly of reference genomes for other endangered species, will  
468 continue to contribute to both understanding and conservation of global biodiversity (Kraus et  
469 al., submitted).

470

471

## 472 **Acknowledgements**

473 The planning and diligence of the VaquitaCPR team were critical in collection, preservation and  
474 rapid delivery of tissue samples for tissue culture that made this project possible. We are grateful  
475 to all people involved in obtaining and culturing the tissue samples. Kelly Robertson was  
476 instrumental in ensuring rapid import of the samples under CITES permit (permit No.  
477 17US774233/9; Mexican export permit MX89760). Tissue samples are stored in the SWFSC  
478 Marine Mammal and Sea Turtle Research (MMASTR) collection under MMPA permit 19091.  
479 We thank Annabel Beichman for help with PSMC analysis and Prof. Eelco Rohling for  
480 assistance with interpretation of sea level data. We are grateful to Cisco Werner, Director of  
481 Scientific Programs and Chief Science Advisor for NOAA Fisheries, for funding sequencing of  
482 the vaquita genome. Earlier versions of the manuscript have been improved thanks to careful  
483 review by Love Dalén and Mark Chaisson.

484

485

## 486 **Data Availability**

487 The vaquita reference genome and all sequence data are available via the Vertebrate Genome  
488 Project GenomeArk website ([https://vgp.github.io/genomeark/Phocoena\\_sinus/](https://vgp.github.io/genomeark/Phocoena_sinus/)) and NCBI  
489 Genome database (Bioprojects PRJNA557831 and PRJNA557832). Annotation is available at  
490 NCBI ([www.ncbi.nlm.nih.gov/genome/annotation\\_euk/Phocoena\\_sinus/100/](http://www.ncbi.nlm.nih.gov/genome/annotation_euk/Phocoena_sinus/100/)). Ensembl  
491 annotation for the vaquita is available via the VGP pre-release data portal  
492 ([projects.ensembl.org/vgp](http://projects.ensembl.org/vgp)) and will be fully integrated into the Ensembl genome browser  
493 ([ensembl.org](http://ensembl.org)), including comparative data, in release 101, due to go live by August 2020.

494

495

## 496 **Author Contributions**

497 PAM, EDJ and OAR initiated the project, and PAM, EDJ and OF designed and led research and  
498 analyses and co-wrote the manuscript. FIA, BH, JRB, JM, and OF generated data. JM and SPaez

499 initiated the project for the VGP. AP, AR, BH, AF, GF, KH, JR, JTorrence, MJPC, WC, SPalen  
500 and YVB contributed to data processing and genome assembly. MLH, ACM, JAF and CDA  
501 cultured cell lines, and AW, BLT, CRS, FMDG, JTeilmann, LR-B, MPH-J, RSW, SS, TR and  
502 WM conducted the field work to obtain and process the tissue samples. All authors contributed  
503 to interpretation of results and preparation of the manuscript.

504

505

506

507 References:

- 508
- 509 Alonge, M., Soyk, S., Ramakrishnan, S., Wang, X., Goodwin, S., Sedlazeck, F. J., . . . Schatz, M.  
510 C. (2019). RaGOO: fast and accurate reference-guided scaffolding of draft genomes.  
511 *Genome Biology*, 20(1), 224. doi:10.1186/s13059-019-1829-6
- 512 Armstrong, E. E., Taylor, R. W., Prost, S., Blinston, P., van der Meer, E., Madzikanda, H., . . .  
513 Petrov, D. (2019). Cost-effective assembly of the African wild dog (*Lycaon pictus*)  
514 genome using linked reads. *Gigascience*, 8(2). doi:10.1093/gigascience/gyi124
- 515 Arnason, U., Lammers, F., Kumar, V., Nilsson, M. A., & Janke, A. (2018). Whole-genome  
516 sequencing of the blue whale and other rorquals finds signatures for introgressive gene  
517 flow. *Science Advances*, 4(4), eaap9873. doi:10.1126/sciadv.aap9873
- 518 Autenrieth, M., Hartmann, S., Lah, L., Roos, A., Dennis, A. B., & Tiedemann, R. (2018). High-  
519 quality whole-genome sequence of an abundant Holarctic odontocete, the harbour  
520 porpoise (*Phocoena phocoena*). *Molecular Ecology Resources*, 18(6), 1469-1481.  
521 doi:10.1111/1755-0998.12932
- 522 Beichman, A. C., Phung, T. N., & Lohmueller, K. E. (2017). Comparison of single genome and  
523 allele frequency data reveals discordant demographic histories. *G3*, 7(11), 3605-3620.  
524 doi:10.1534/g3.117.300259
- 525 Ben Chehida, Y., Aguilar, A., Borrel, A., Ferreira, M., Taylor, B. L., Rojas-Bracho, L., . . .  
526 Fontaine, M. C. (in revision). Evolutionary history of the porpoise family (Phocoenidae)  
527 across the speciation continuum: a phylogeographic perspective from the complete  
528 mitochondrial genome. *BioRxiv doi 10.1101/851469*. doi:10.1101/851469
- 529 Brownell Jr., R. L. (1983). *Phocoena sinus*. *Mammalian Species*, 198, 1-3.
- 530 Chattopadhyay, B., Garg, K. M., Yun Jing, S., Low, G. W., Frechette, J., & Rheindt, F. E.  
531 (2019). Conservation genomics in the fight to help the recovery of the critically  
532 endangered Siamese crocodile *Crocodylus siamensis*. *Molecular Ecology*, 28(5), 936-  
533 950. doi:10.1111/mec.15023
- 534 Chin, C. S., Peluso, P., Sedlazeck, F. J., Nattestad, M., Concepcion, G. T., Clum, A., . . . Schatz,  
535 M. C. (2016). Phased diploid genome assembly with single-molecule real-time  
536 sequencing. *Nature Methods*, 13(12), 1050-1054. doi:10.1038/nmeth.4035
- 537 Chow, W., Brugger, K., Caccamo, M., Sealy, I., Torrance, J., & Howe, K. (2016). gEVAL - a  
538 web-based browser for evaluating genome assemblies. *Bioinformatics*, 32(16), 2508-  
539 2510. doi:10.1093/bioinformatics/btw159

- 540 D'Agrosa, C., Lennert-Cody, C. E., & Vidal, O. (2000). Vaquita bycatch in Mexico's artisanal  
541 gillnet fisheries: Driving a small population to extinction. *Conservation Biology*, *14*(4),  
542 1110-1119. doi:10.1046/j.1523-1739.2000.98191.x
- 543 Day, S. B., Bryant, E. H., & Meffert, L. M. (2003). The influence of variable rates of inbreeding  
544 on fitness, environmental responsiveness, and evolutionary potential. *Evolution*, *57*(6),  
545 1314-1324. doi:10.1111/j.0014-3820.2003.tb00339.x
- 546 Dornburg, A., Brandley, M. C., McGowen, M. R., & Near, T. J. (2012). Relaxed clocks and  
547 inferences of heterogeneous patterns of nucleotide substitution and divergence time  
548 estimates across whales and dolphins (Mammalia: Cetacea). *Molecular Biology and*  
549 *Evolution*, *29*(2), 721-736. doi:10.1093/molbev/msr228
- 550 Dussex, N., van der Valk, T., Wheat, C. W., Diez-del-Molino, D., von Seth, J., Foster, Y., . . .  
551 Dalén, L. (in revision). Population genomics reveals the impact of small population size  
552 in the critically endangered kākāpō *Nature Ecology and Evolution*.
- 553 Excoffier, L., Dupanloup, I., Huerta-Sanchez, E., Sousa, V. C., & Foll, M. (2013). Robust  
554 demographic inference from genomic and SNP data. *PLoS Genetics*, *9*(10), e1003905.  
555 doi:10.1371/journal.pgen.1003905
- 556 Fan, G., Zhang, Y., Liu, X., Wang, J., Sun, Z., Sun, S., . . . Liu, X. (2019). The first  
557 chromosome-level genome for a marine mammal as a resource to study ecology and  
558 evolution. *Molecular Ecology Resources*, *19*(4), 944-956. doi:10.1111/1755-0998.13003
- 559 Foote, A. D., Liu, Y., Thomas, G. W., Vinar, T., Alföldi, J., Deng, J., . . . Gibbs, R. A. (2015).  
560 Convergent evolution of the genomes of marine mammals. *Nature Genetics*, *47*(3), 272-  
561 275. doi:10.1038/ng.3198
- 562 Foote, A. D., Martin, M. D., Louis, M., Pacheco, G., Robertson, K. M., Sinding, M.-H. S., . . .  
563 Morin, P. A. (2019). Killer whale genomes reveal a complex history of recurrent  
564 admixture and vicariance. *Molecular Ecology*, *28*, 3427-3444. doi:10.1111/mec.15099
- 565 Foote, A. D., Vijay, N., Ávila-Arcos, M. C., Baird, R. W., Durban, J. W., Fumagalli, M., . . .  
566 Wolf, J. B. W. (2016). Genome-culture coevolution promotes rapid divergence in the  
567 killer whale. *Nature Communications*, *7*, Article No. 11693. doi:10.1038/ncomms11693
- 568 Formenti, G., Fedrigo, O., Howe, K., Balacco, J., Haase, B., Mountcastle, J., . . . Jarvis, E. D. (in  
569 prep). Complete and near error-free mitochondrial genome assemblies with long reads  
570 reveal unreported gene duplications and repeats. *Nature*.
- 571 Garner, B. A., Hand, B. K., Amish, S. J., Bernatchez, L., Foster, J. T., Miller, K. M., . . . Luikart,  
572 G. (2016). Genomics in conservation: case studies and bridging the gap between data and

- 573 application. *Trends in Ecology and Evolution*, 31(2), 81-83.  
574 doi:10.1016/j.tree.2015.10.009
- 575 Garrison, E., & Marth, G. (2012). Haplotype-based variant detection from short-read sequencing.  
576 *arXiv:1207.3907 [q-bio.GN]*.
- 577 Ghurye, J., Pop, M., Koren, S., Bickhart, D., & Chin, C. S. (2017). Scaffolding of long read  
578 assemblies using long range contact information. *BMC Genomics*, 18(1), 527.  
579 doi:10.1186/s12864-017-3879-z
- 580 Gilpin, M. E., & Soulé, M. E. (1986). Minimum viable populations: processes of species  
581 extinction. In M. E. Soulé (Ed.), *Conservation Biology: The science of scarcity and*  
582 *diversity* (pp. 19-34): Sinauer.
- 583 Harrison, K. A., Pavlova, A., Telonis-Scott, M., & Sunnucks, P. (2014). Using genomics to  
584 characterize evolutionary potential for conservation of wild populations. *Evolutionary*  
585 *Applications*, 7(9), 1008-1025. doi:10.1111/eva.12149
- 586 He, X., Johansson, M. L., & Heath, D. D. (2016). Role of genomics and transcriptomics in  
587 selection of reintroduction source populations. *Conservation Biology*, 30(5), 1010-1018.  
588 doi:10.1111/cobi.12674
- 589 Hedrick, P. W., Robinson, J. A., Peterson, R. O., & Vucetich, J. A. (2019). Genetics and  
590 extinction and the example of Isle Royale wolves. *Animal Conservation*, 22(3), 302-309.  
591 doi:10.1111/acv.12479
- 592 Hohn, A. A., Read, A. J., Fernandez, S., Vidal, O., & Findley, L. T. (1996). Life history of the  
593 vaquita, *Phocoena sinus* (Phocoenidae, Cetacea). *Journal of Zoology*, 239, 235-251.  
594 doi:DOI 10.1111/j.1469-7998.1996.tb05450.x
- 595 Jaramillo-Legorreta, A. M., Cardenas-Hinojosa, G., Nieto-Garcia, E., Rojas-Bracho, L., Thomas,  
596 L., Ver Hoef, J. M., . . . Tregenza, N. (2019). Decline towards extinction of Mexico's  
597 vaquita porpoise (*Phocoena sinus*). *Royal Society Open Science*, 6(7).  
598 doi:10.1098/rsos.190598
- 599 Jaramillo-Legorreta, A. M., Rojas-Bracho, L., & Gerrodette, T. (1999). A new abundance  
600 estimate for vaquitas: First step for recovery. *Marine Mammal Science*, 15(4), 957-973.  
601 doi:10.1111/j.1748-7692.1999.tb00872.x
- 602 Keane, M., Semeiks, J., Webb, A. E., Li, Y. I., Quesada, V., Craig, T., . . . de Magalhaes, J. P.  
603 (2015). Insights into the evolution of longevity from the bowhead whale genome. *Cell*  
604 *Reports*, 10(1), 112-122. doi:10.1016/j.celrep.2014.12.008

- 605 Korneliussen, T. S., Albrechtsen, A., & Nielsen, R. (2014). ANGSD: Analysis of next generation  
606 sequencing data. *BMC Bioinformatics*, *15*, 356. doi:10.1186/s12859-014-0356-4
- 607 Kraus, R. H. S., Paez, S., Ceballos, G., Crawford, A., Fedrigo, O., Finnegan, S., . . . Jarvis, E. D.  
608 (submitted). The role of genomics in conserving biodiversity during the sixth mass  
609 extinction. *Nature Reviews Genetics*.
- 610 Li, H., & Durbin, R. (2009). Fast and accurate short read alignment with Burrows-Wheeler  
611 transform. *Bioinformatics*, *25*(14), 1754-1760. doi:10.1093/bioinformatics/btp324
- 612 Li, H., & Durbin, R. (2011). Inference of human population history from individual whole-  
613 genome sequences. *Nature*, *475*(7357), 493-496. doi:10.1038/nature10231
- 614 Lischer, H. E. L., & Shimizu, K. K. (2017). Reference-guided de novo assembly approach  
615 improves genome reconstruction for related species. *BMC Bioinformatics*, *18*(1), 474.  
616 doi:10.1186/s12859-017-1911-6
- 617 Mazet, O., Rodriguez, W., Grusea, S., Boitard, S., & Chikhi, L. (2016). On the importance of  
618 being structured: instantaneous coalescence rates and human evolution--lessons for  
619 ancestral population size inference? *Heredity (Edinb)*, *116*(4), 362-371.  
620 doi:10.1038/hdy.2015.104
- 621 McGowen, M. R., Spaulding, M., & Gatesy, J. (2009). Divergence date estimation and a  
622 comprehensive molecular tree of extant cetaceans. *Molecular Phylogenetics and*  
623 *Evolution*, *53*(3), 891-906. doi:10.1016/j.ympev.2009.08.018
- 624 McKenna, A., Hanna, M., Banks, E., Sivachenko, A., Cibulskis, K., Kernysky, A., . . . DePristo,  
625 M. A. (2010). The Genome Analysis Toolkit: a MapReduce framework for analyzing  
626 next-generation DNA sequencing data. *Genome Research*, *20*(9), 1297-1303.  
627 doi:10.1101/gr.107524.110
- 628 Morin, P. A., Alexander, A., Blaxter, M., Caballero, S., Fedrigo, O., Fontaine, M. C., . . . Jarvis,  
629 E. D. (in revision). Building genomic infrastructure: Sequencing platinum-standard  
630 reference-quality genomes of all cetacean species. *Marine Mammal Science*.
- 631 Morin, P. A., Foote, A. D., Baker, C. S., Hancock-Hanser, B. L., Kaschner, K., Mate, B. R., . . .  
632 Alexander, A. (2018a). Demography or selection on linked cultural traits or genes?  
633 Investigating the driver of low mtDNA diversity in the sperm whale using  
634 complementary mitochondrial and nuclear genome analyses. *Molecular Ecology*, *27*(11),  
635 2604-2619. doi:10.1111/mec.14698
- 636 Morin, P. A., Foote, A. D., Hill, C. M., Simon-Bouhet, B., Lang, A. R., & Louise, M. (2018b).  
637 SNP discovery from single and multiplex genome assemblies of non-model organisms. In



- 638 S. R. Head, P. Ordoukhanian, & D. Salomon (Eds.), *Next-Generation Sequencing*.  
639 *Methods in Molecular Biology* (Vol. 1712, pp. 113-144): Humana Press.
- 640 Munguia-Vega, A., Esquer-Garrigos, Y., Rojas-Bracho, L., Vazquez-Juarez, R., Castro-Prieto,  
641 A., & Flores-Ramirez, S. (2007). Genetic drift vs. natural selection in a long-term small  
642 isolated population: major histocompatibility complex class II variation in the Gulf of  
643 California endemic porpoise (*Phocoena sinus*). *Molecular Ecology*, *16*(19), 4051-4065.  
644 doi:10.1111/j.1365-294X.2007.03319.x
- 645 Norris, K. S., & McFarland, W. N. (1958). A new harbor porpoise of the genus *Phocoena* from  
646 the Gulf of California. *Journal of Mammalogy*, *39*, 22-39.
- 647 Orozco-terWengel, P. (2016). The devil is in the details: the effect of population structure on  
648 demographic inference. *Heredity*, *116*(4), 349-350. doi:10.1038/hdy.2016.9
- 649 Rhie, A., McCarthy, S. A., Fedrigo, O., Damas, J., Formenti, G., Koren, S., . . . Jarvis, E. D.  
650 (2020a). Towards complete and error-free genome assemblies of all vertebrate species.  
651 *bioRxiv*. doi:10.1101/2020.05.22.110833
- 652 Rhie, A., Walenz, B. P., Koren, S., & Phillippy, A. M. (2020b). Merqury: reference-free quality  
653 and phasing assessment for genome assemblies. *bioRxiv*. doi:10.1101/2020.03.15.992941
- 654 Roach, M. J., Schmidt, S. A., & Borneman, A. R. (2018). Purge Haplotigs: allelic contig  
655 reassignment for third-gen diploid genome assemblies. *BMC Bioinformatics*, *19*(1), 460.  
656 doi:10.1186/s12859-018-2485-7
- 657 Robinson, J. A., Brown, C., Kim, B. Y., Lohmueller, K. E., & Wayne, R. K. (2018). Purging of  
658 strongly deleterious mutations explains long-term persistence and absence of inbreeding  
659 depression in island foxes. *Current Biology*, *28*(21), 3487-3494 e3484.  
660 doi:10.1016/j.cub.2018.08.066
- 661 Robinson, J. A., Ortega-Del Vecchyo, D., Fan, Z., Kim, B. Y., vonHoldt, B. M., Marsden, C. D.,  
662 . . . Wayne, R. K. (2016). Genomic flatlining in the endangered island fox. *Current*  
663 *Biology*, *26*(9), 1183-1189. doi:10.1016/j.cub.2016.02.062
- 664 Robinson, J. A., Raikkonen, J., Vucetich, L. M., Vucetich, J. A., Peterson, R. O., Lohmueller, K.  
665 E., & Wayne, R. K. (2019). Genomic signatures of extensive inbreeding in Isle Royale  
666 wolves, a population on the threshold of extinction. *Science Advances*, *5*(5), eaau0757.  
667 doi:10.1126/sciadv.aau0757
- 668 Rodriguez-Perez, M. Y., Auriolos-Gamboa, D., Sanchez-Velasco, L., Lavin, M. F., & Newsome,  
669 S. D. (2018). Identifying critical habitat of the endangered vaquita (*Phocoena sinus*) with



- 670 regional delta C-13 and delta N-15 isoscapes of the Upper Gulf of California, Mexico.  
671 *Marine Mammal Science*, 34(3), 790-805. doi:10.1111/mms.12483
- 672 Rohling, E. J., Hibbert, F. D., Williams, F. H., Grant, K. M., Marino, G., Foster, G. L., . . .  
673 Yokoyama, Y. (2017). Differences between the last two glacial maxima and implications  
674 for ice-sheet, delta O-18, and sea-level reconstructions. *Quaternary Science Reviews*,  
675 176, 1-28. doi:10.1016/j.quascirev.2017.09.009
- 676 Rojas-Bracho, L., Gulland, F. M. D., Smith, C. R., Taylor, B., Wells, R. S., Thomas, P. O., . . .  
677 Walker, S. (2019). A field effort to capture critically endangered vaquitas *Phocoena sinus*  
678 for protection from entanglement in illegal gillnets. *Endangered Species Research*, 38,  
679 11-27. doi:10.3354/esr00931
- 680 Rojas-Bracho, L., & Reeves, R. R. (2013). Vaquitas and gillnets: Mexico's ultimate cetacean  
681 conservation challenge. *Endangered Species Research*, 21(1), 77-87.  
682 doi:10.3354/esr00501
- 683 Rojas-Bracho, L., & Taylor, B. L. (1999). Risk factors affecting the vaquita (*Phocoena sinus*).  
684 *Marine Mammal Science*, 15(4), 974-989. doi:10.1111/j.1748-7692.1999.tb00873.x
- 685 Rosel, P. E., Haygood, M. G., & Perrin, W. F. (1995). Phylogenetic relationships among the true  
686 porpoises (Cetacea:Phocoenidae). *Molecular Phylogenetics and Evolution*, 4(4), 463-474.  
687 doi:10.1006/mpev.1995.1043
- 688 Rosel, P. E., & Rojas-Bracho, L. (1999). Mitochondrial DNA variation in the critically  
689 endangered vaquita *Phocoena sinus* Norris and Macfarland, 1958. *Marine Mammal*  
690 *Science*, 15(4), 990-1003. doi:10.1111/j.1748-7692.1999.tb00874.x
- 691 Siddall, M., Rohling, E. J., Almogi-Labin, A., Hemleben, C., Meischner, D., Schmelzer, I., &  
692 Smeed, D. A. (2003). Sea-level fluctuations during the last glacial cycle. *Nature*,  
693 423(6942), 853-858. doi:10.1038/nature01690
- 694 Smit, A., Hubley, R., & Green, P. (2013-2015). RepeatMasker Open 4.0:  
695 <http://www.repeatmasker.org>.
- 696 Springer, M. S., Emerling, C. A., Fugate, N., Patel, R., Starrett, J., Morin, P. A., . . . Gatesy, J.  
697 (2016a). Inactivation of cone-specific phototransduction genes in rod monochromatic  
698 cetaceans. *Frontiers in Ecology and Evolution*, 4, Article No. 61.  
699 doi:10.3389/fevo.2016.00061
- 700 Springer, M. S., Starrett, J., Morin, P. A., Hayashi, C., & Gatesy, J. (2016b). Inactivation of  
701 C4orf26 in toothless placental mammals. *Molecular Phylogenetics and Evolution*, 95, 34-  
702 45. doi:10.1016/j.ympev.2015.11.002

- 703 Supple, M. A., & Shapiro, B. (2018). Conservation of biodiversity in the genomics era. *Genome*  
704 *Biology*, 19(131). doi:10.1186/s13059-018-1520-3
- 705 Taylor, B. L., Chivers, S. J., Larese, J., & Perrin, W. F. (2007). *Generation length and percent*  
706 *mature estimates for IUCN assessments of cetaceans* (Administrative Report LJ-07-01).  
707 Retrieved from [https://swfsc.noaa.gov/publications/TM/SWFSC/NOAA-TM-NMFS-](https://swfsc.noaa.gov/publications/TM/SWFSC/NOAA-TM-NMFS-SWFSC-550.pdf)  
708 [SWFSC-550.pdf](https://swfsc.noaa.gov/publications/TM/SWFSC/NOAA-TM-NMFS-SWFSC-550.pdf)
- 709 Taylor, B. L., & Rojas-Bracho, L. (1999). Examining the risk of inbreeding depression in a  
710 naturally rare cetacean, the vaquita (*Phocoena sinus*). *Marine Mammal Science*, 15(4),  
711 1004-1028. doi:10.1111/j.1748-7692.1999.tb00875.x
- 712 Taylor, B. L., Wells, R. S., Olson, P. A., Brownell, R. L., Gulland, F. M. D., Read, A. J., . . .  
713 Rojas-Bracho, L. (2019). Likely annual calving in the vaquita, *Phocoena sinus*: A new  
714 hope? *Marine Mammal Science*, 35(4), 1603-1612. doi:10.1111/mms.12595
- 715 Thomas, L., Jaramillo-Legorreta, A., Cardenas-Hinojosa, G., Nieto-Garcia, E., Rojas-Bracho, L.,  
716 Ver Hoef, J. M., . . . Tregenza, N. (2017). Last call: Passive acoustic monitoring shows  
717 continued rapid decline of critically endangered vaquita. *Journal of the Acoustical*  
718 *Society of America*, 142(5), E1512-E1517. doi:10.1121/1.5011673
- 719 Tollis, M., Robbins, J., Webb, A. E., Kuderna, L. F. K., Caulin, A. F., Garcia, J. D., . . . Maley,  
720 C. C. (2019). Return to the sea, get huge, beat cancer: An analysis of cetacean genomes  
721 including an assembly for the humpback whale (*Megaptera novaeangliae*). *Molecular*  
722 *Biology and Evolution*, 36(8), 1746-1763. doi:10.1093/molbev/msz099
- 723 Tunstall, T., Kock, R., Vahala, J., Diekhans, M., Fiddes, I., Armstrong, J., . . . Steiner, C. C.  
724 (2018). Evaluating recovery potential of the northern white rhinoceros from  
725 cryopreserved somatic cells. *Genome Research*, 28(6), 780-788.  
726 doi:10.1101/gr.227603.117
- 727 Van Cise, A. M., Baird, R. W., Baker, C. S., Cerchio, S., Claridge, D., Fielding, R., . . . Morin, P.  
728 A. (2019). Oceanographic barriers, divergence, and admixture: Phylogeography and  
729 taxonomy of two putative subspecies of short-finned pilot whale. *Molecular Ecology*, 28,  
730 2886-2902. doi:10.1111/mec.15107
- 731 Waterhouse, R. M., Seppey, M., Simao, F. A., Manni, M., Ioannidis, P., Klioutchnikov, G., . . .  
732 Zdobnov, E. M. (2017). BUSCO applications from quality assessments to gene prediction  
733 and phylogenomics. *Molecular Biology and Evolution*, 35(3), 543-548.  
734 doi:10.1093/molbev/msx319
- 735 Westbury, M. V., Hartmann, S., Barlow, A., Wiesel, I., Leo, V., Welch, R., . . . Hofreiter, M.  
736 (2018). Extended and continuous decline in effective population size results in low

- 737 genomic diversity in the world's rarest hyena species, the brown hyena. *Molecular*  
738 *Biology & Evolution*, 35(5), 1225-1237. doi:10.1093/molbev/msy037
- 739 Westbury, M. V., Petersen, B., Garde, E., Heide-Jorgensen, M. P., & Lorenzen, E. D. (2019).  
740 Narwhal genome reveals long-term low genetic diversity despite current large abundance  
741 size. *iScience*, 15, 592-599. doi:10.1016/j.isci.2019.03.023
- 742 Xue, Y., Prado-Martinez, J., Sudmant, P. H., Narasimhan, V., Ayub, Q., Szpak, M., . . . Scally,  
743 A. (2015). Mountain gorilla genomes reveal the impact of long-term population decline  
744 and inbreeding. *Science*, 348(6231), 242-245. doi:10.1126/science.aaa3952
- 745 Yim, H.-S., Cho, Y. S., Guang, X., Kang, S. G., Jeong, J.-Y., Cha, S.-S., . . . Lee, J.-H. (2014).  
746 Minke whale genome and aquatic adaptation in cetaceans. *Nature Genetics*, 46, 88-92.  
747 doi:10.1038/ng.2835
- 748 Zhou, X., Guang, X., Sun, D., Xu, S., Li, M., Seim, I., . . . Yang, G. (2018). Population genomics  
749 of finless porpoises reveal an incipient cetacean species adapted to freshwater. *Nature*  
750 *Communications*, 9(1), Article number: 1276. doi:10.1038/s41467-018-03722-x  
751

Table 1. Vaquita genome assembly metrics. Genome size is the kmer estimate based on GenomeScope (v1.0) analysis of the 10X Genomics data with  $k = 31$ . The BUSCO score is for complete genes identified from the mammalian single-copy conserved gene data set.

| Genome quality metric             |                       |
|-----------------------------------|-----------------------|
| Contig N50                        | 20.22 Mb              |
| Scaffold N50 (max size)           | 115.47 Mb (185.85 Mb) |
| No. scaffolds (primary haplotype) | 64                    |
| Base quality (QV)                 | 40.9                  |
| Genes identified (BUSCO)          | 91.6%                 |
| Assembly size (ungapped)          | 2,363,494,880 bp      |
| Assembly size (total)             | 2,371,540,524 bp      |
| Genome size                       | 2,667,451,016 bp      |

Table 2. Estimated genome sequence average depth of raw data coverage (before adapter and quality trimming) for sequencing and mapping technologies based on an estimated genome size of 2.7 Gb.

| Data type          | Raw data (bp)   | Coverage |
|--------------------|-----------------|----------|
| 10x Genomics       | 200,218,960,380 | 74X      |
| Arima Genomics HiC | 255,724,383,000 | 94X      |
| Bionano Genomics   | 480,155,600,000 | 178X     |
| PacBio SubReads    | 325,960,000,000 | 121X     |

Table 3. Repetitive content of the vaquita genome (total assembly length 23.72 Gb) as determined by RepeatMasker.

| Repeat type     | Length (bp)   | % of Genome |
|-----------------|---------------|-------------|
| SINEs           | 189,109,608   | 7.97%       |
| LINEs           | 653,546,597   | 27.56%      |
| LTR             | 134,757,334   | 5.68%       |
| DNA transposons | 76,591,695    | 3.23%       |
| Unclassified    | 1,047,864     | 0.04%       |
| Satellites      | 1,588,863     | 0.07%       |
| Simple repeats  | 23,753,228    | 1%          |
| Low complexity  | 4,527,734     | 0.19%       |
| Total repeats:  | 1,085,270,145 | 45.76%      |

**Figure 1. HiC heat-map of genomic interactions.** Interactions between two locations are depicted by a dark blue pixel. Gray lines depict scaffold boundaries for the 22 chromosome-length scaffolds. Different scaffolds should not share any interactions (pixels off diagonal outside the scaffold boundaries), while patterns within a scaffold show chromosome-substructure.

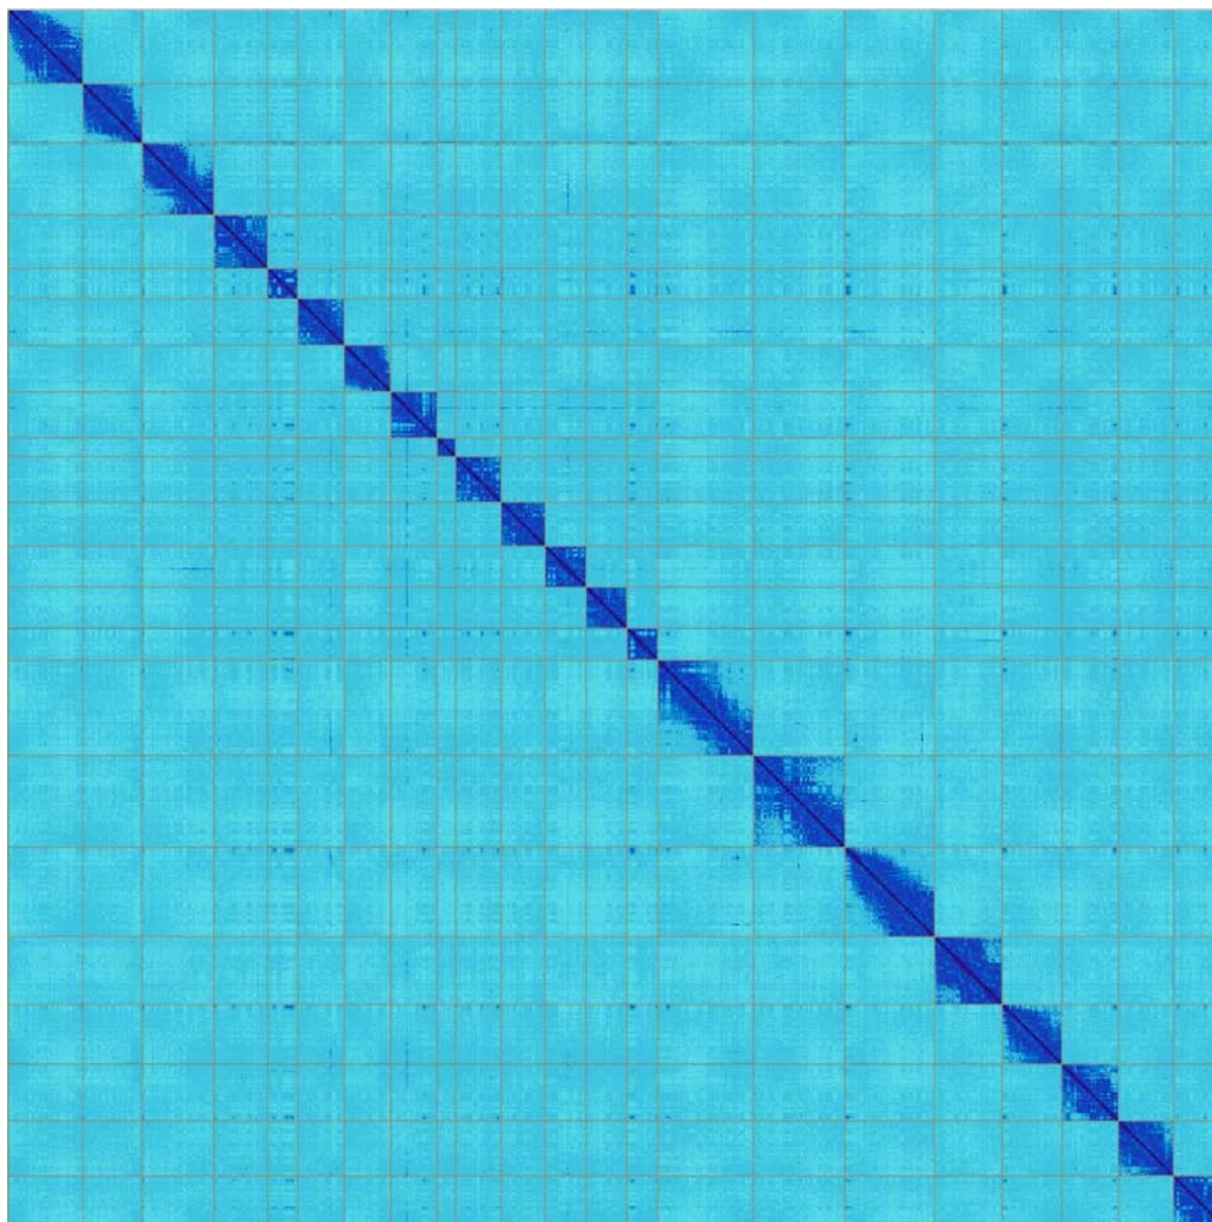



**Figure 2. Distributions of heterozygosity across the vaquita genome.** A) Bar plot shows per-site heterozygosity in nonoverlapping 1-Mb windows across 22 scaffolds >10 Mb in length. Scaffolds are shown in alternating shades. B) Histogram of the count of per-window heterozygosity levels.

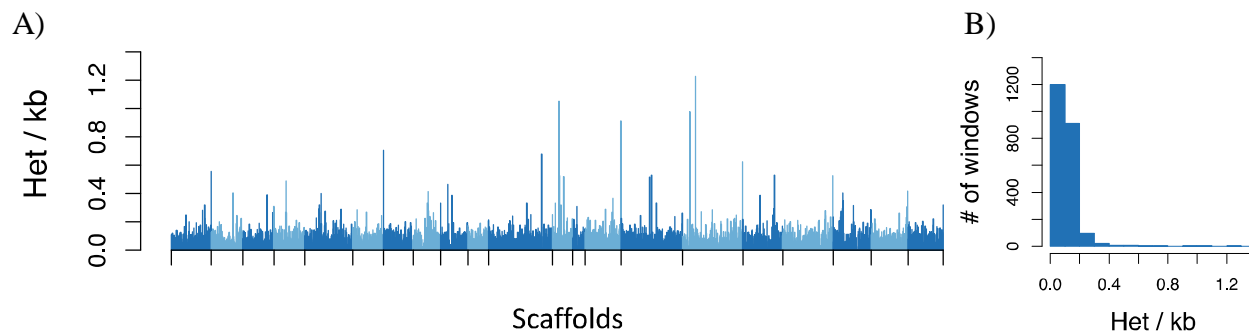

**Figure 3. Comparison of genome-wide heterozygosity ( $\pi$ ) among mammals.** Values are drawn from the literature, based on Robinson et al. (2016), plus the vaquita and blue whale. Dots are colored by the endangered status according to the Red List for Threatened Species, International Union for Conservation of Nature (IUCN). Although the Baiji, or Yangtze River dolphin, is listed as critically endangered, it is believed to have been extinct since at least 2006 (Turvey et al., 2007). See supplemental Table S4 for heterozygosity information.

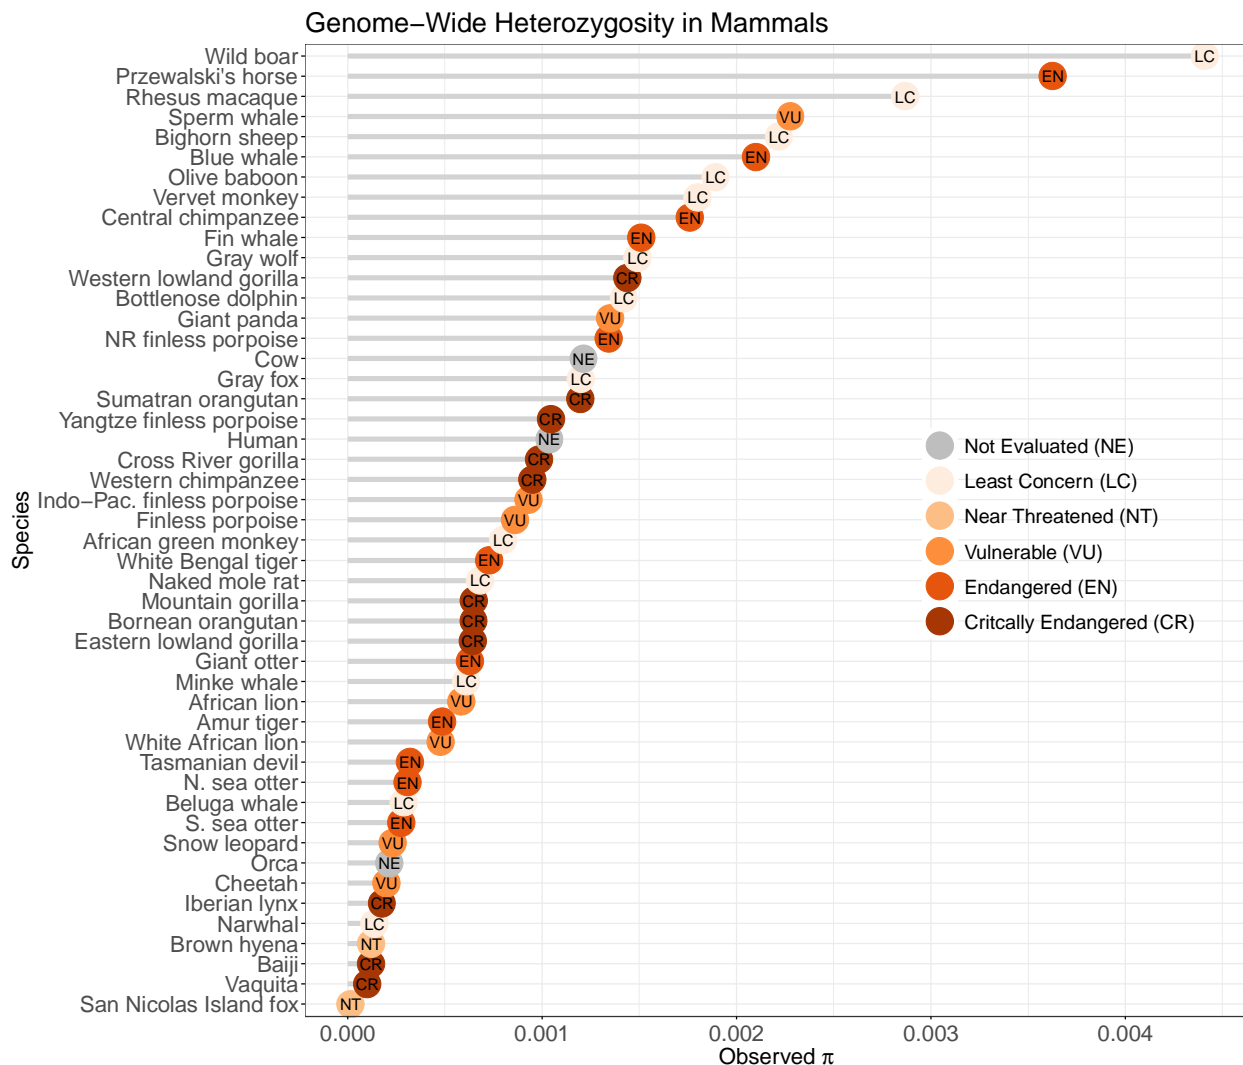

**Figure 4. Changes in vaquita population size over time.** A) Changes in effective population size ( $N_e$ ) of the vaquita over time inferred from PSMC analysis of the nuclear genome. The darker blue line represents the median and lighter lines represent the 100 bootstrap replicates. The black line shows relative sea level (right axis, compared to present) with 95% confidence intervals (gray dashed lines) from Grant et al. (2014), and shading corresponds to cold and warm periods. B – D) Heatmap of the distribution of the negative log-likelihood ( $-\log L$ ) of the empirical heterozygosity distribution across pairs of demographic parameters from the coalescent model, with higher likelihood combinations shown by lighter color. The dashed white line in (D) represents a 1:1 slope, where current and historical population sizes would have been equal before and after the modeled change in population size.

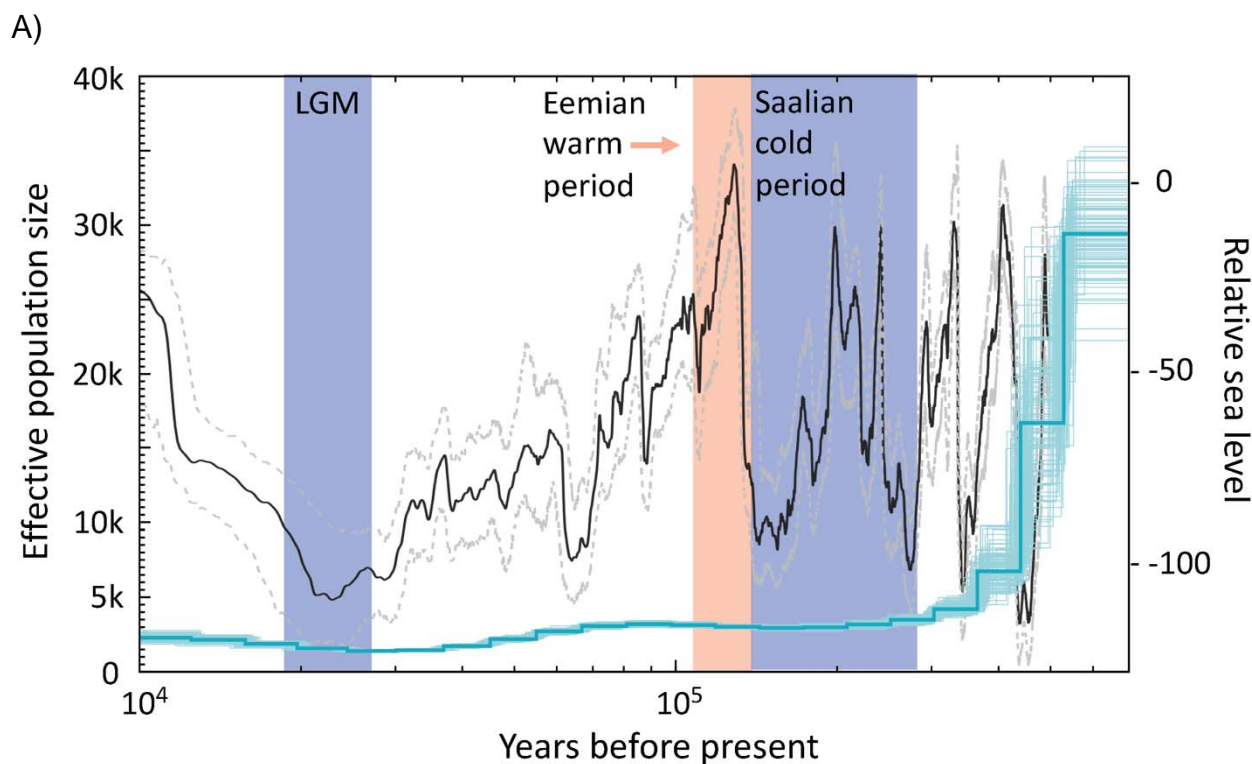

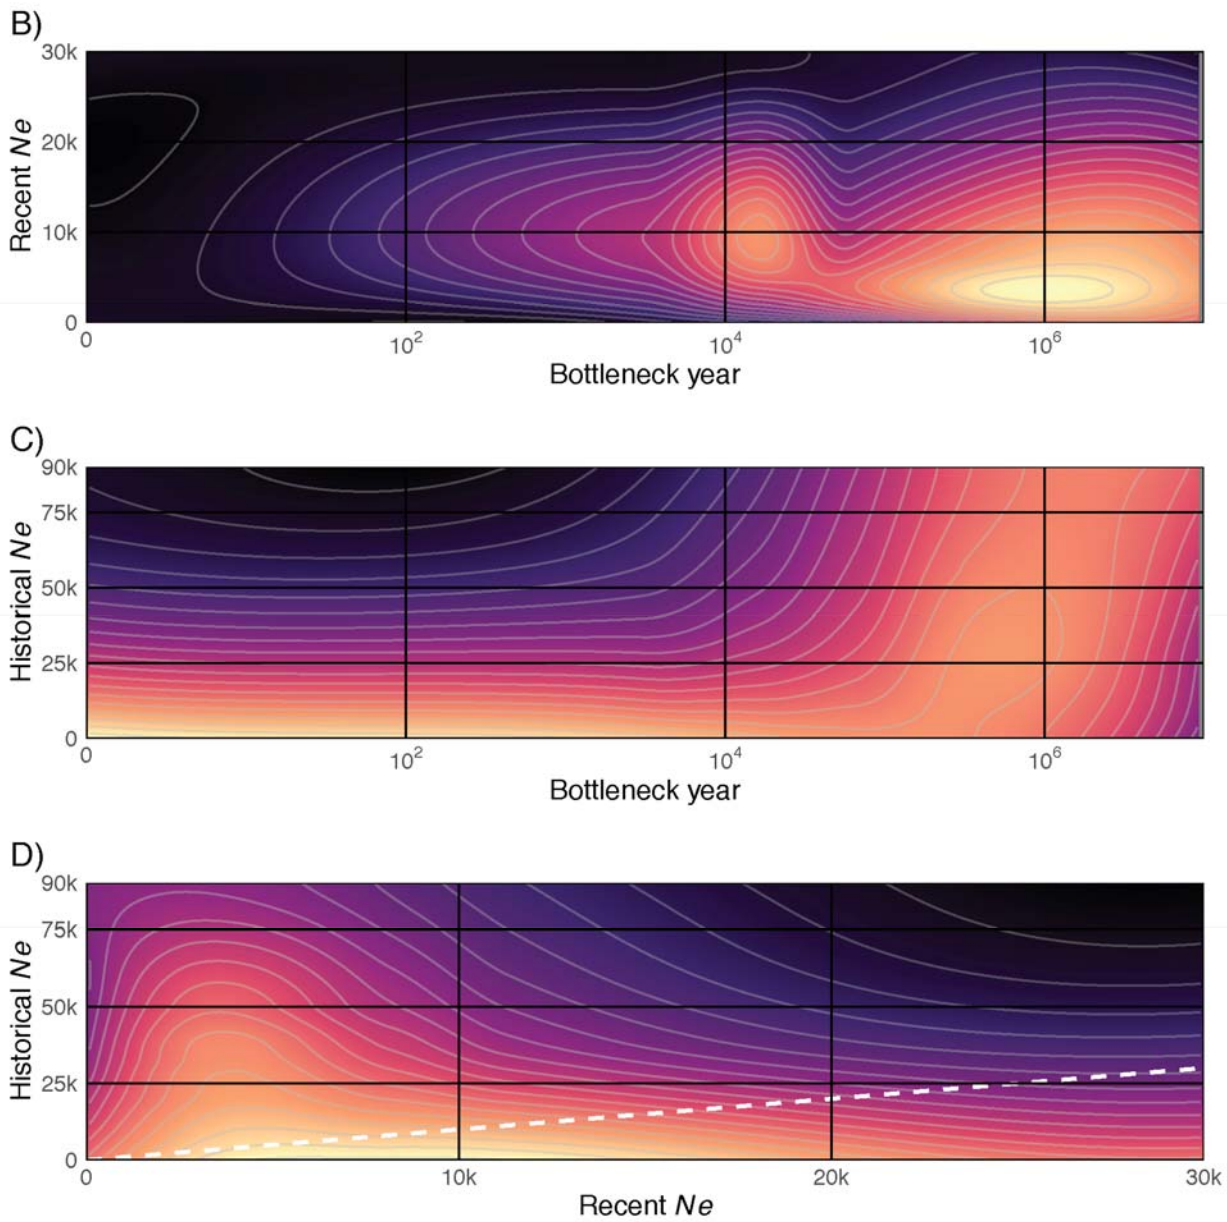

**Figure 5. Bathymetric map of the Gulf of California showing 500m isobath lines.** Transition to yellow is at -140m, indicating portions of the Gulf that were likely above sea level during the last two glacial maxima, ~22,000 and 140,000 years ago. The area north of the red line is the approximate historical range of the vaquita (Brownell, 1986).

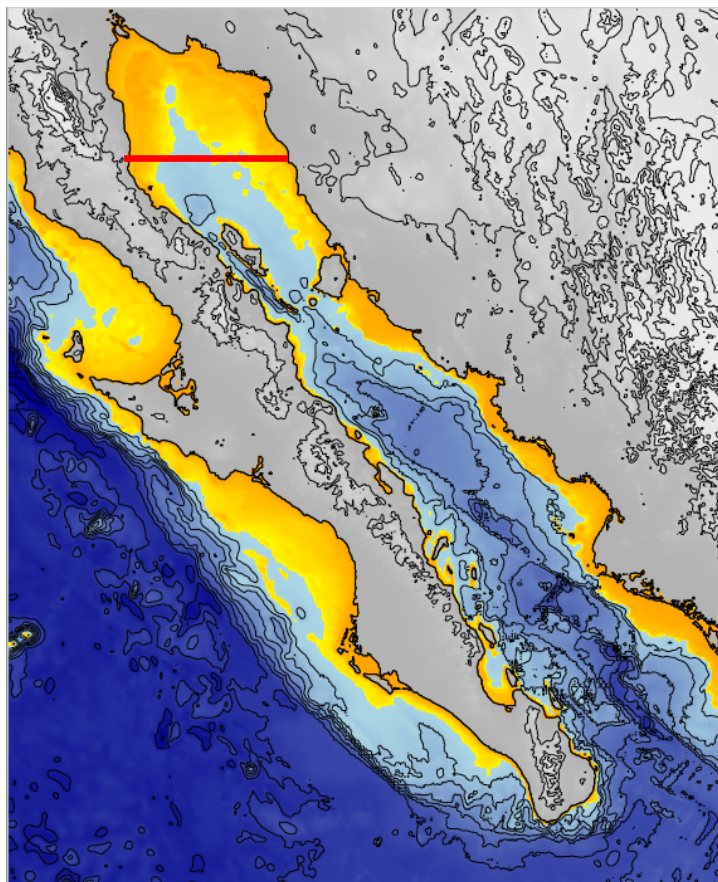

Source: https://www.biorxiv.org/content/biorxiv/early/2020/05/28/2020.05.27.098582.full.pdf
